# Supplementary material for: Tungsten oxysulfide nanosheets for highly sensitive and selective NH3sensing
Source: Royal Society of Chemistry journal article supplement (doi:10.1039/c9tc06686a), 2020-01-01
Supplement: c9tc06686a1.pdf [file c9tc06686a1.pdf]

## Supporting Information

# Tungsten Oxysulphide Nanosheets for Highly Sensitive and Selective NH<sub>3</sub> Sensing

Yanan Zheng,<sup>a,§</sup> Lan Sun,<sup>a,§</sup> Weiwei Liu,<sup>a</sup> Chen Wang,<sup>a</sup> Zhengfei Dai,<sup>a,b,\*</sup> and Fei Ma<sup>a,\*</sup>

<sup>a</sup> State Key Laboratory for Mechanical Behavior of Materials, Xi'an Jiaotong University, Xi'an 710049, Shaanxi, People's Republic of China.

\*Corresponding author: mafei@mail.xjtu.edu.cn (F. M.); sensdai@mail.xjtu.edu.cn (Z.D.).

<sup>b</sup> State Key Laboratory for Powder Metallurgy, Central South University, Changsha 410083, China.

§ These authors contributed equally in this work.

### S1. The density functional theory (DFT) calculations

The density functional theory (DFT) calculations were carried in the lattice structures of WS<sub>2</sub>, tungsten oxysulphide and WO<sub>3</sub> to make sure the stable configurations of ammonia molecule absorption. For pure WS<sub>2</sub>, we considered three absorption sites (Figure S5a-c), namely, on top of a W atom (T<sub>W1</sub>), on top of a S atom (T<sub>S1</sub>), on a hollow

site ( $T_{h1}$ ).<sup>S1</sup> By comparing the total energy ( $E_{total}$ ) of the involved sites in Table S3, we choose the stable site  $T_h$  with the lowest  $E_{total}$ . As for tungsten oxysulphide, in the same way, we choose five absorption sites (Figure S6a-e), on a hollow site ( $T_{h2}$ ), on top of a O atom with N atom absorbing ( $T_{O-N}$ ), on top of a S atom ( $T_{S2}$ ), on top of a W atom ( $T_{W2}$ ) and on top of a O atom with H atom absorbing ( $T_{O-H}$ ). The  $T_{O-H}$  site of configuration owned the lowest  $E_{total}$  (Table S4). For pure  $WO_3$ , two sites were considered, on top of a W atom with N atom absorbing ( $T_{W-N}$ ), on top of a W atom with H atom absorbing ( $T_{W-H}$ ).<sup>S2</sup> In the process of calculating  $E_{total}$  of two sites,  $T_{W-H}$  site of configuration is unstable, switching to  $T_{W-N}$ , so the  $E_{total}$  of  $T_{W-N}$  configuration is - 312.689 eV (Table S5).

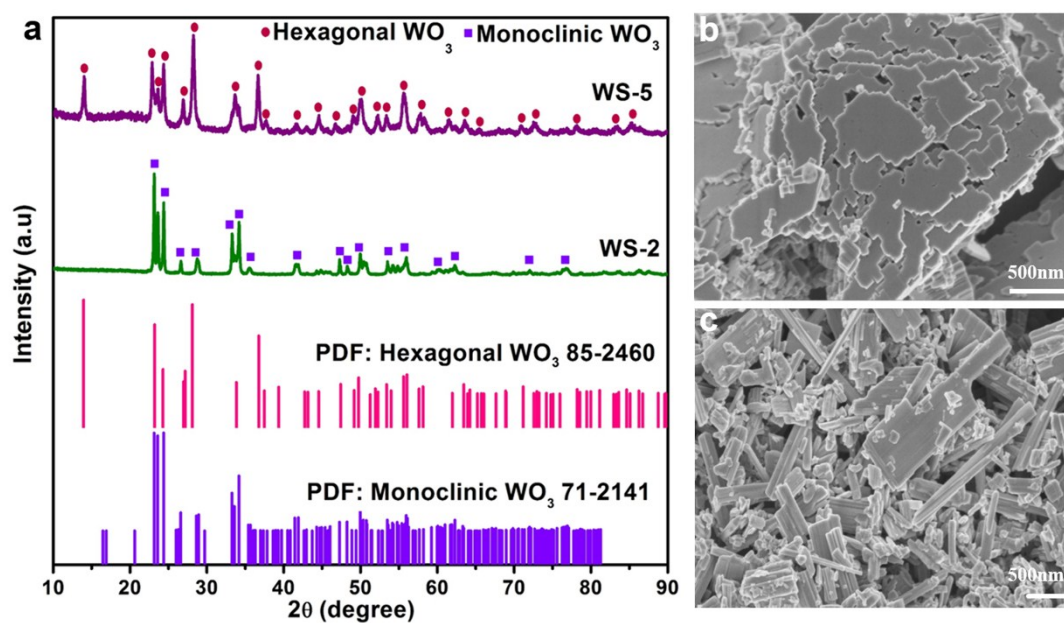

**Figure S1.** (a) XRD pattern obtained from WS-2 and WS-5 using the different ratios of  $\text{WCl}_6$  and TAA (1:2, 1:5). (b, c) Typical SEM image obtained from thin films: (b) hexagonal  $\text{WO}_3$  nanosheets, (c) monoclinic  $\text{WO}_3$  nanorods.

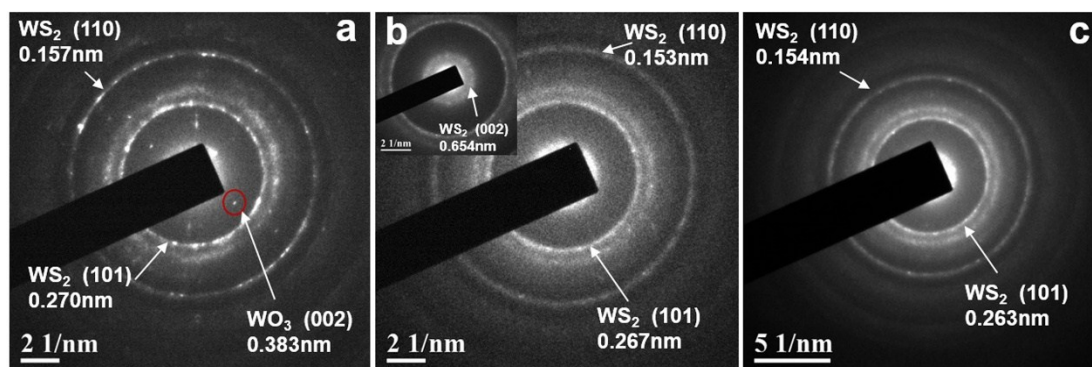

**Figure S2.** (a) SAED pattern of WS-10. (b) SAED pattern of WS-15. (c) SAED pattern of WS-20.

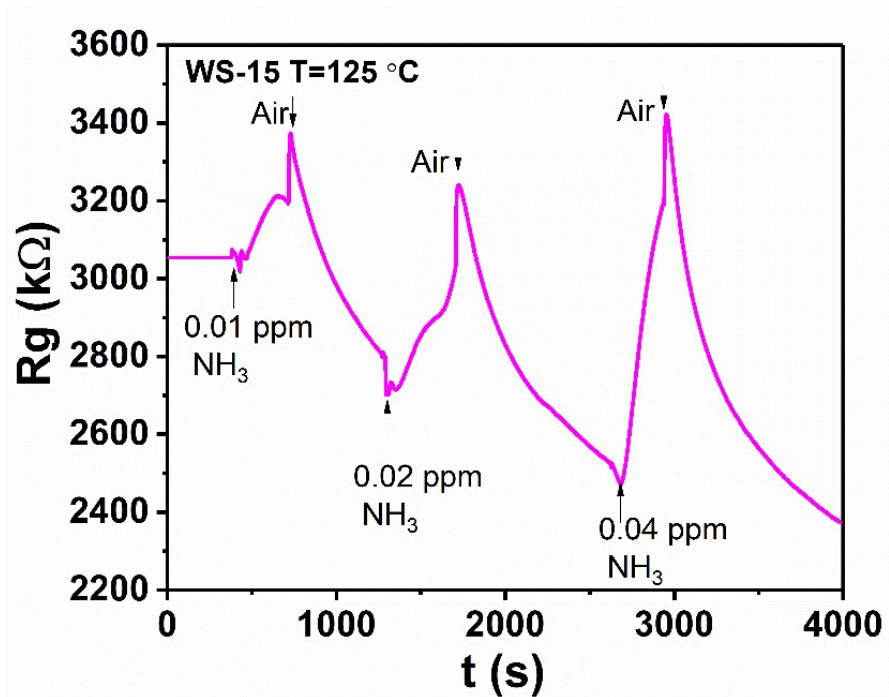

**Figure S3.** The dynamic sensing signals on exposure to 0.01, 0.02 and 0.04 ppm  $NH_3$  for WS-15 at 125 °C.

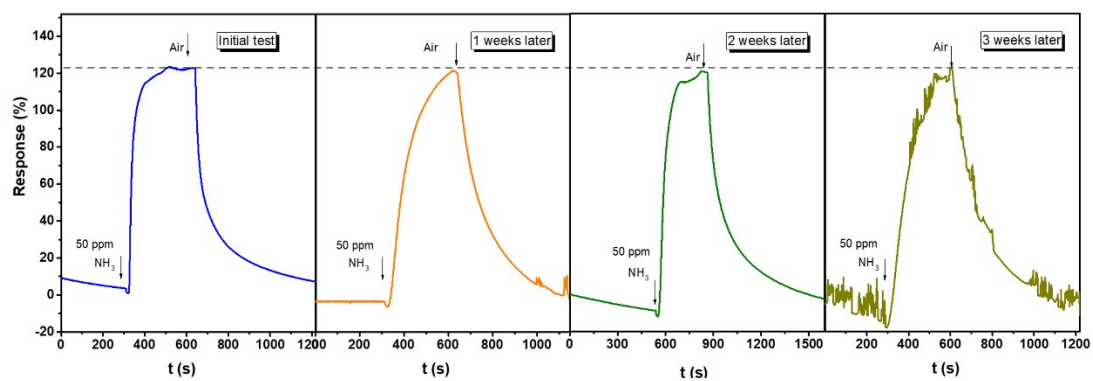

**Figure S4.** The sensing response of the WS-15 sample toward 50 ppm NH<sub>3</sub> at 125 °C for 3 weeks.

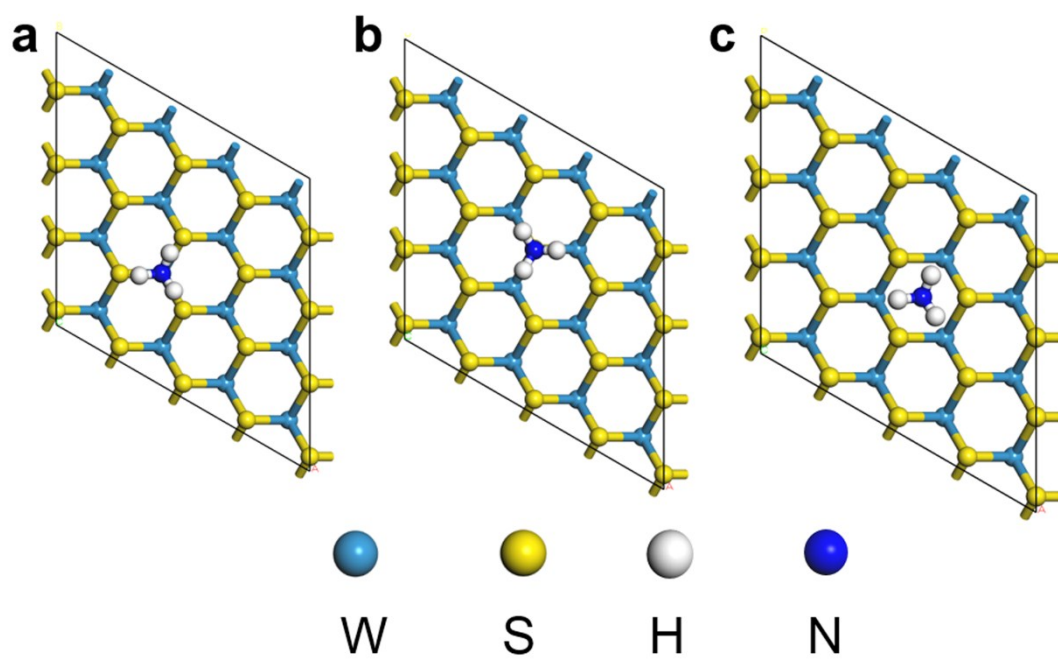

**Figure S5.** Different sites of WS<sub>2</sub> configuration. (a) On top of a W atom ( $T_{W1}$ ). (b) On top of a S atom ( $T_{S1}$ ). (c) On a hollow site ( $T_{H1}$ ).

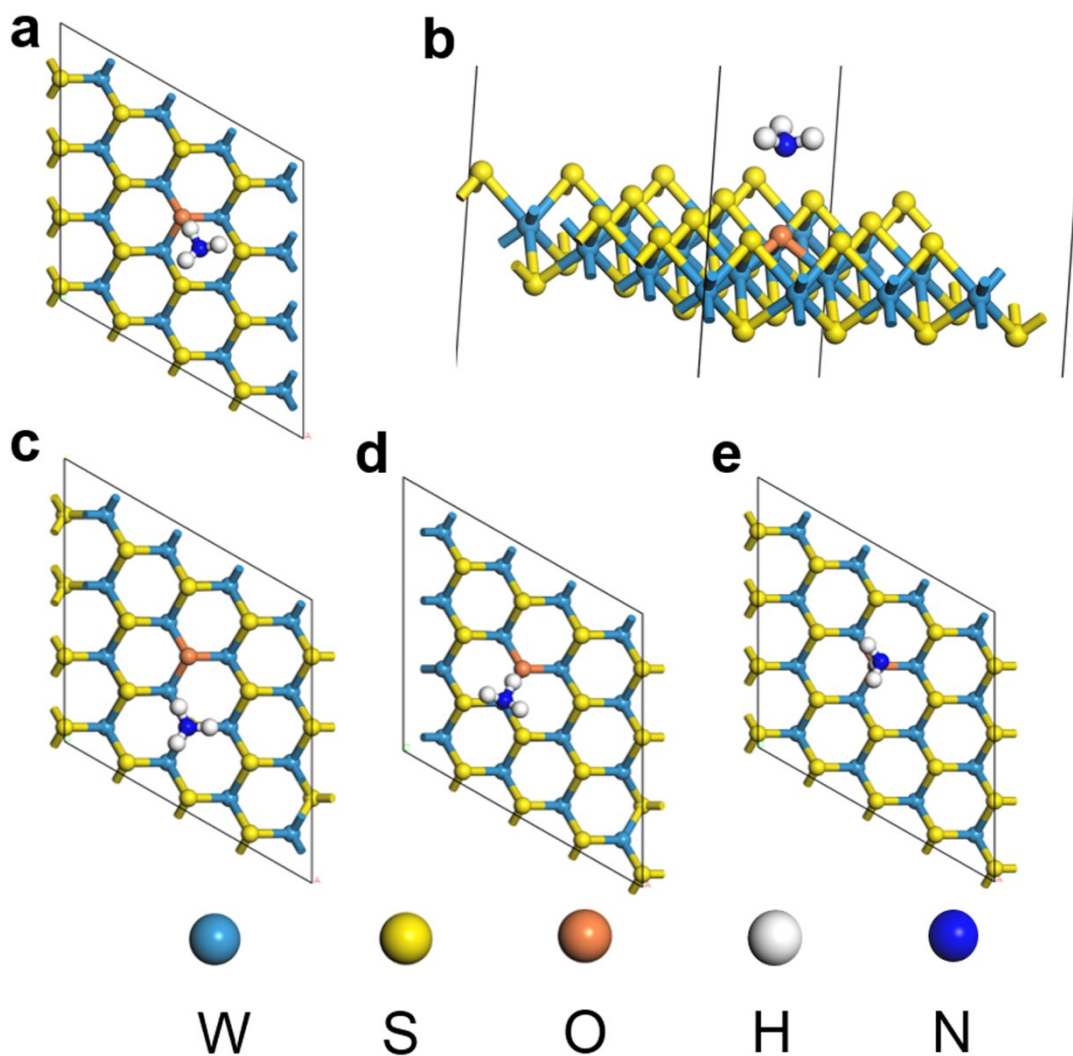

**Figure S6.** Different sites of tungsten oxysulphide configuration. (a) On a hollow site ( $T_{h2}$ ). (b) On top of an O atom with N atom absorbing ( $T_{O-N}$ ). (c) On top of a S atom ( $T_{S2}$ ). (d) On top of a W atom ( $T_{W2}$ ). (e) On top of an O atom with H atom absorbing ( $T_{O-H}$ ).



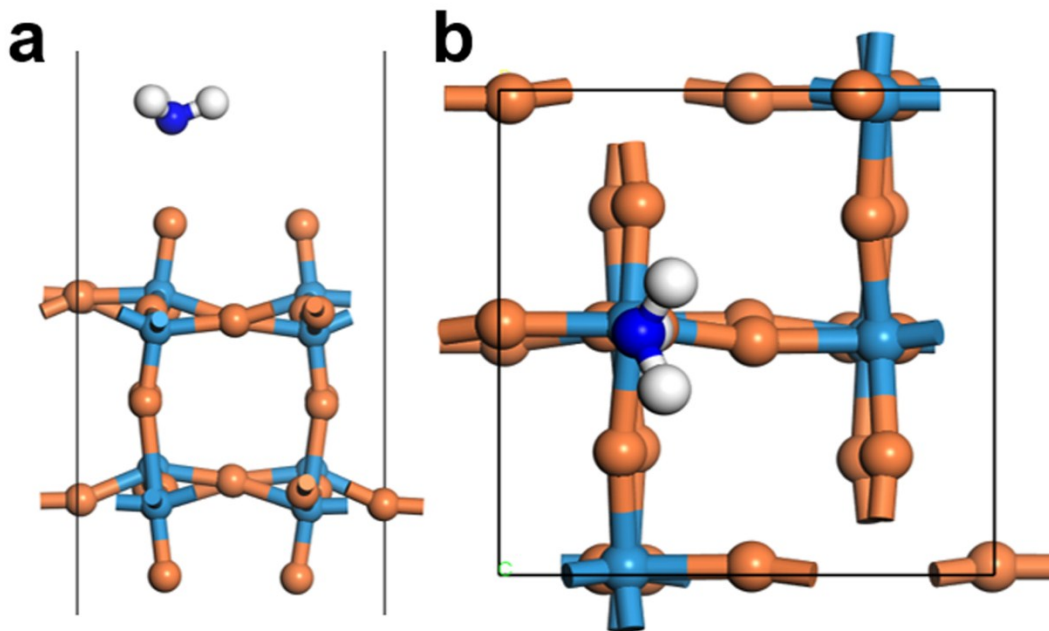

**Figure S7.** Different sites of WO<sub>3</sub> configuration. (a) On top of a W atom with N atom absorbing ( $T_{W-N}$ ). (b) On top of a W atom with H atom absorbing ( $T_{W-H}$ ).

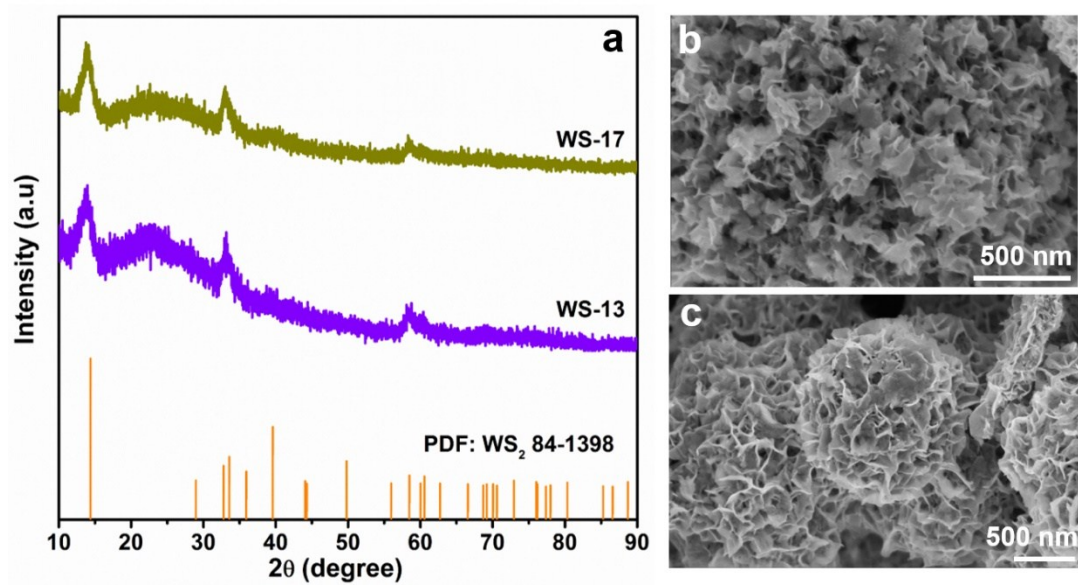

**Figure S8.** The XRD patterns of WS-13 and WS-17 (a), SEM images of (b) WS-13 and (c) WS-17.

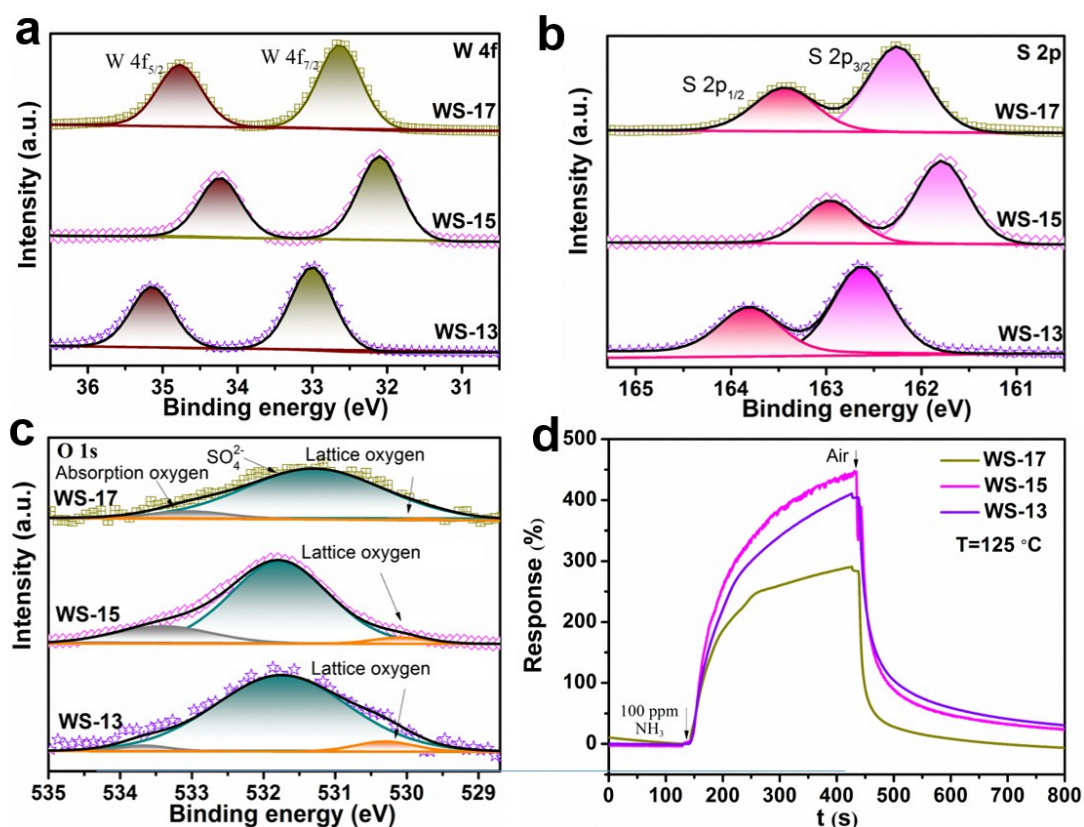

**Figure S9.** XPS spectra of WS-13, WS-15 and WS-17: (a) W 4f, (b) S2p, (c) O1s, and (d) The sensing responses of WS-13, WS-15 and WS-17 to 100 ppm  $\text{NH}_3$  at 125 °C.

As shown in the Figure S8, both the WS-13 and WS-17 samples are featured with the similar phase and nanosheet morphology as the WS-15 materials. The corresponding XPS spectra are presented in t Figure S9a-c, wherein their O/(S+O) molar ratios were calculated as 17.8% (WS-13), 10.9% (WS-15), and 13.7% (WS-15). Figure S9d further compares the sensing properties of WS-13, WS-15 and WS-17 samples to 100 ppm  $\text{NH}_3$  at 125 °C.

**Table S1.** The binding energies of W 4f and S 2p respectively from WS-10, WS-15 and WS-20.

| Material | W 4f <sub>7/2</sub> (eV) | W 4f <sub>5/2</sub> (eV) | S 2p <sub>3/2</sub> (eV) | S 2p <sub>1/2</sub> (eV) |
|----------|--------------------------|--------------------------|--------------------------|--------------------------|
| WS-10    | 33.23                    | 35.38                    | 162.87                   | 164.06                   |
| WS-15    | 32.12                    | 34.25                    | 161.79                   | 162.96                   |
| WS-20    | 32.70                    | 34.86                    | 162.40                   | 163.57                   |

**Table S2.** Comparison of NH<sub>3</sub> sensing performances between tungsten oxysulphide and other reported TMDs.

| Sensing material                             | S (%)  | Conc. (ppm) | Lowest Conc. detected (ppm) | Ref.      |
|----------------------------------------------|--------|-------------|-----------------------------|-----------|
| Single-layer MoSe <sub>2</sub>               | 300    | 300         | 100                         | [S3]      |
| SnS <sub>2</sub> /SnO <sub>2</sub> composite | 148    | 100         | 10                          | [S4]      |
| Au doped MoS <sub>2</sub>                    | 120    | 100         | 25                          | [S5]      |
| Exfoliated SnS <sub>2</sub>                  | 320    | 500         | 20                          | [S6]      |
| TiO <sub>2</sub> QDs/WS <sub>2</sub>         | 140    | 500         | 20                          | [S7]      |
| PANI-WS <sub>2</sub>                         | 81     | 200         | 50                          | [S8]      |
| WS <sub>2</sub> /WO <sub>3</sub> nanohybrid  | 420    | 1000        | 250                         | [S9]      |
| MoS <sub>2</sub> thin film                   | 120    | 100         | 10                          | [S10]     |
| MoTe <sub>2</sub>                            | 90     | 100         | 2                           | [S11]     |
| Tungsten oxysulphide                         | 450.23 | 100         | 0.01                        | This work |

**Table S3.** The total energies ( $E_{\text{total}}$ ) of WS<sub>2</sub> configuration system at T<sub>W1</sub>, T<sub>S1</sub> and T<sub>h1</sub> sites.

| Material        | $E_{\text{total-T}_{W1}}$ (eV) | $E_{\text{total-T}_{S1}}$ (eV) | $E_{\text{total-T}_{h1}}$ (eV) |
|-----------------|--------------------------------|--------------------------------|--------------------------------|
| WS <sub>2</sub> | -414.03                        | -413.96                        | -414.04                        |

**Table S4.** The total energies ( $E_{\text{total}}$ ) of tungsten oxysulphide configuration system at  $T_{\text{h2}}$ ,  $T_{\text{O-N}}$ ,  $T_{\text{S2}}$ ,  $T_{\text{W2}}$  and  $T_{\text{O-H}}$  sites.

| Material                               | Tungsten oxysulphide |
|----------------------------------------|----------------------|
| $E_{\text{total}}-T_{\text{h2}}$ (eV)  | -415.98              |
| $E_{\text{total}}-T_{\text{O-N}}$ (eV) | -415.95              |
| $E_{\text{total}}-T_{\text{S2}}$ (eV)  | -415.90              |
| $E_{\text{total}}-T_{\text{W2}}$ (eV)  | -415.95              |
| $E_{\text{total}}-T_{\text{O-H}}$ (eV) | -416.06              |

**Table S5.** The total energies ( $E_{\text{total}}$ ) of  $\text{WO}_3$  configuration system at  $T_{\text{W-N}}$ , and  $T_{\text{W-H}}$  sites.

| Material      | $E_{\text{total}}-T_{\text{W-N}}$ (eV) | $E_{\text{total}}-T_{\text{W-H}}$ (eV) |
|---------------|----------------------------------------|----------------------------------------|
| $\text{WO}_3$ | -312.689                               | ...                                    |

**Table S6.** The  $E_{\text{gas/sensors}}$ ,  $E_{\text{gas}}$ ,  $E_{\text{sensors}}$  and  $E_{\text{a}}$ , of tungsten oxysulphide,  $\text{WS}_2$  and  $\text{WO}_3$ .

| Material             | $E_{\text{gas/sensors}}$ (eV) | $E_{\text{gas}}$ (eV) | $E_{\text{sensors}}$ (eV) | $E_{\text{a}}$ (eV) |
|----------------------|-------------------------------|-----------------------|---------------------------|---------------------|
| $\text{WS}_2$        | -414.040                      | -19.561               | -394.306                  | -0.172              |
| Tungsten oxysulphide | -416.061                      | -19.561               | -396.242                  | -0.258              |
| $\text{WO}_3$        | -312.687                      | -19.561               | -292.956                  | -0.170              |

### [Reference]

- S1 B. Cho, M. G. Hahm, M. Choi, J. Yoon, A. R. Kim, Y. J. Lee, S. G. Park, J. D. Kwon, C. S. Kim, M. Song, Y. Jeong, K. S. Nam, S. Lee, T. J. Yoo, C. G. Kang, B. H. Lee, H. C. Ko, P. M. Ajayan and D. H. Kim, *Scientific Reports*, 2015, **5**, 8052.
- S2 Y. Zhang, W. Zeng and Y. Li, *Ceram. Int.*, 2019, **45**, 6043-6050.
- S3 D. J. Late, T. Doneux and M. Bougouma, *Appl. Phys. Lett.*, 2014, **105**, 233103
- S4 R. Li, K. Jiang, S. Chen, Z. Lou, T. Huang, D. Chen and G. Shen, *RSC Adv.*, 2017, **7**, 52503-52509.

- S5 H. Yan, P. Song, S. Zhang, J. Zhang, Z. Yang and Q. Wang, *Ceram. Int.*, 2016, **42**, 9327-9331.
- S6 Z. Qin, K. Xu, H. Yue, H. Wang, J. Zhang, C. Ouyang, C. Xie and D. Zeng, *Sens. Actuators, B*, 2018, **262**, 771-779.
- S7 Z. Qin, C. Ouyang, J. Zhang, L. Wan, S. Wang, C. Xie and D. Zeng, *Sens. Actuators, B*, 2017, **253**, 1034-1042.
- S8 R. K. Jha, M. Wan, C. Jacob and P. K. Guha, *New J. Chem.*, 2018, **42**, 735-745.
- S9 R. K. Jha, C. J. Meher Wan and P. K. Guha, *IEEE Sens. J.*, 2018, **18**, 3494-3501.
- S10 S. Sharma, A. kumar and D. kaur, *AIP Conf. Proc.*, 2018, **1953**, 030131.
- S11 Z. Feng, Y. Xie, J. Chen, Y. Yu, S. Zheng, R. Zhang, Q. Li, X. Chen, C. Sun, H. Zhang, W. Pang, J. Liu and D. Zhang, *2D Mater.*, 2017, **4**, 025018.
